27 **Abstract**

28 The rapid development of research on the therapeutic benefits of medicinal cannabis, in parallel with  
29 an increased understanding of the endocannabinoid system, has driven research of *Cannabis sativa*  
30 constituents for managing neurological conditions. While most studies have focused on the therapeutic  
31 potential of the major components of cannabis plant extract isolated or combined, limited research has  
32 explored the pharmacological benefits of whole cannabis plant extract. In this study, we investigated  
33 the potential anti-inflammatory and neuroprotective effects of NTI-164, a novel full-spectrum cannabis  
34 extract with negligible  $\Delta^9$ -tetrahydrocannabinol (THC), compared with cannabidiol (CBD) alone in  
35 BV-2 microglial and SHSY-5Y neuronal cells. The inflammation-induced upregulation of microglial  
36 inflammatory mediators, being tumour necrosis factor  $\alpha$  (TNF $\alpha$ ), granulocyte-macrophage colony-  
37 stimulating factor (GM-CSF), inducible nitric oxide synthase (iNOS), and Arginase-1 (Arg-1), were  
38 significantly attenuated by NTI-164. This immunomodulatory effect was not observed upon treatment  
39 with isolated CBD. Compared to CBD alone, NTI-164 prevented elevated mitochondrial activity while  
40 normalising cell numbers in immune-activated microglia cells. NTI-164 also promoted the proliferation  
41 of undifferentiated neurons and the survival of differentiated neurons under excitotoxic conditions.  
42 Overall, our work shows that the anti-inflammatory and neuroprotective effects of NTI-164 as a full-  
43 spectrum cannabis extract are enhanced relative to that of CBD alone, highlighting the potential  
44 therapeutic efficacy of NTI-164 for the treatment of neuropathologies such as autism spectrum disorder  
45 (ASD) and related neuropathologies. This study has further shown that understanding the synergistic  
46 effect of phytocannabinoids is integral to realising the therapeutic potential of full-spectrum cannabis  
47 extract to inform the design of botanical-derived treatments for managing neurological disorders.

48

49 **Keywords:** Autism, botanical synergy, cytokines, full-spectrum cannabis extract,  
50 neurodevelopmental disorders

## 51 **Introduction**

52 Despite differences in clinical profiles, genetics, and symptoms among neurological diseases, many  
53 central nervous system (CNS) disorders share substantial similarities in cerebrovascular impairments  
54 and immune dysregulation associated with neuroinflammation as the underlying pathophysiological  
55 mechanism of disease [1, 2]. In particular, the role of the neuroimmune axis in the pathogenesis of  
56 neurodevelopmental disorders, including autism spectrum disorder (ASD), has been the focus of intense  
57 research during the past decade [3-6]. The hallmarks of ASD are social and behavioural deficits, often  
58 associated with intellectual disabilities, hyperactivity, anxiety, epilepsy and cognitive impairments [7,  
59 8]. Despite the rising prevalence of this neurodevelopmental disorder [9, 10], significant economic  
60 burden [11, 12], and ongoing research efforts, the underlying etiopathogenesis of ASD remains unclear.  
61 The aetiology of ASD involves intricate interactions between multiple genetic and environmental risk  
62 factors during the critical period of nervous system development, resulting in aberrant neuroplasticity  
63 with long-term alterations in brain physiology and behavioural processes [13, 14]. The complex clinical  
64 profile of ASD, compounded with significant genetic heterogeneity, has further hindered efforts to  
65 dissect underlying disease mechanisms and develop effective pharmacological therapies [15, 16].  
66 Consequently, there are no effective medications to address the core symptoms of ASD, with the current  
67 pharmacotherapies targeted at ASD comorbidities frequently associated with adverse side effects and  
68 relatively low efficacy [17, 18].

69 Accumulating evidence highlights the potential role of neuroglial cells and, in particular, disruption of  
70 homeostatic microglial function directly contributing to ASD etiopathogenesis [5, 6]. Microglia are  
71 myeloid cells of mesodermal origin and the only glial cells to enter the developing brain preceding  
72 neurogenesis during the perinatal period [19, 20]. Microglia have a diverse array of physiological  
73 functions in adulthood and mediate key developmental processes, including astrocyte formation, early  
74 synaptogenesis, synaptic plasticity, synaptic remodelling (pruning) plus the regulation of adult  
75 neurogenesis [5, 19, 21, 22]. In response to signs of homeostatic disturbance, microglia shift activity  
76 states and transform from homeostatic to an 'activated state', such as immune activation, which can  
77 result in distinct response phenotypes [23]. Depending on the pathological condition and its impacts on

78 the local microenvironment, microglia contribute various immune-related activities through the  
79 differential release of molecules, including pro-inflammatory mediators, anti-inflammatory cytokines,  
80 or neurotrophins [5]. The activation states of microglia in response to brain insults have historically  
81 been broadly divided into the two reactive phenotypes of an M1 pro-inflammatory response and an M2  
82 neuroprotective response [22]. Although an oversimplification [24], these terms are helpful for basic  
83 function descriptions in simplified systems, such as *in vitro* paradigms like those in this study.

84 Consistent with human and animal studies that have demonstrated glial abnormalities in ASD-related  
85 phenotype [3, 13, 25-28], several imaging studies have further reported the presence of markedly  
86 immune-activated microglia cells with morphological alterations in multiple brain regions of young  
87 ASD patients [29-32]. The role of microglia in neuroinflammation in these individuals is also supported  
88 by the observation of differential expression of inflammatory cytokines in different brain regions of  
89 children with ASD [33, 34].

90 Endogenous endocannabinoids, together with their receptors (CB1 and CB2) and associated metabolic  
91 enzymes (the endocannabinoid system, ECS), are critical regulators of early neuronal plasticity [35]  
92 and behavioural processes [36]. In immune-activated microglia, CB2 receptors modulate synaptic  
93 activity and neuroinflammatory responses [37]. A large body of evidence further supports the  
94 involvement of ECS in ASD-related neurodevelopmental processes, as aberrant endocannabinoid  
95 signalling pathways are linked to ASD pathogenesis [38-40]. Moreover, recent clinical studies in  
96 children with ASD have demonstrated altered endocannabinoid-CB2 cellular signalling [41] and  
97 circulating endogenous cannabinoids [42, 43], underpinning the importance of the ECS as a potential  
98 therapeutic target for ASD and related neuroinflammatory diseases.

99 The mounting evidence for the involvement of ECS in ASD-related neurodevelopmental processes, in  
100 parallel with the well-researched therapeutic potential of medicinal cannabis, has heightened interest in  
101 using cannabis-derived compounds to treat neurodevelopmental disorders. For centuries, the  
102 therapeutic benefits of *Cannabis sativa* L. extracts have been widely recognised in the treatment of a  
103 broad spectrum of nervous system-related conditions ranging from common neurological and  
104 hyperexcitability disorders such as epilepsy, affective disorders (e.g. anxiety) to neurodegenerative

105 disorders such as Alzheimer's disease [44]. The role of the most abundant non-psychoactive  
106 phytocannabinoid cannabidiol (CBD) in the modulation of inflammatory and immune responses has  
107 been extensively documented [45-47]. Most current research on treating common neurological and  
108 psychiatric disorders is focused on the application of CBD alone or combined with the major  
109 psychoactive cannabis component  $\Delta^9$ -tetrahydrocannabinol (THC) [48-50]. Several lines of evidence  
110 from experimental models suggest that individual phytocannabinoids derived from the *Cannabis sativa*  
111 plant modulate microglial functions by blocking excitotoxic-induced activation [51], inhibiting  
112 intracellular calcium increase [52] and modulating inflammatory responses [53, 54].

113 Clinical evidence is emerging that to improve the safety profile and enhance the therapeutic effects of  
114 cannabis-based treatments, we should be administering CBD combined with other phytocannabinoids  
115 for treating children with neurodevelopmental disorders such as ASD and behavioural-related  
116 symptoms [55-58]. Nearly 25 years ago, the term 'entourage effect' was coined to describe the  
117 synergistic contributions of the multitude of endogenous endocannabinoids in cannabis [59]. The  
118 benefits of the entourage effect over single isolates have been demonstrated in preclinical models of  
119 neurological disorders [60-62] and cancer [63-65]. Increasingly, specific breeding programs are  
120 generating cannabis lines with low THC, often known as hemp plants, but with higher levels of other  
121 cannabinoids.

122 Therefore, this study investigated the entourage effect of a full-spectrum medicinal hemp strain  
123 cannabis plant extract with only 0.08% THC (NTI-164) on inflammatory and excitotoxic responses in  
124 well-established preclinical *in vitro* models.

## 125 **Materials and Methods**

### 126 **Isolation of NTI-164**

127 NTI-164 sativa plant was grown and harvested following the natural process of open pollination. After  
128 harvesting, we ground the dried plant using a commercial herb grinder until the particulates were  
129 approximately 1mm in size. This was to increase the surface area of the plant for subsequent isolation  
130 of plant extract. The ground plant was then mixed at a ratio of 1g to 10 mL with 100% ethanol, and then  
131 this mixture was placed on a rocker at 50 rpm for 4 hours. We then aspirated the mixture into a new  
132 tube, and the remaining particulates were removed via centrifugation at 300G for 10 minutes. We stored  
133 the final extract at -20°C until use, and an aliquot was sent for analysis with ultra-high-performance  
134 liquid chromatography (U-HPLC) to assess the purity and composition of the final extract.

### 135 **Ultra-high-performance liquid chromatography (U-HPLC)**

136 We undertook experiments using an integrated U-HPLC system and a single quadrupole mass  
137 spectrometer (MS) detector with an electrospray ionization (ESI) interface. The following ten  
138 cannabinoids were combined: CBD, cannabidivarin (CBDV), cannabidiolic acid (CBDA),  
139 cannacannabigerol (CBG), tetrahydrocannabivarin (THCV), cannabinol (CBN),  $\Delta^9$ -  
140 tetrahydrocannabinol ( $\Delta^9$ -THC),  $\Delta^8$ -tetrahydrocannabinol ( $\Delta^8$ -THC), cannabichromene (CBC). We  
141 prepared a mixture to contain 10 parts per million (ppm) of each of the ten cannabinoids in methanol.  
142 All solvents were liquid chromatography-MS grade with standards prepared by diluting with 90%  
143 mobile phase B and 10% deionized water. Reference standard solutions previously shown to be suitable  
144 for generating calibration curves were obtained as pre-dissolved solutions from Novachem, Cerilliant  
145 Corporation (TX, USA).

### 146 **Microglial BV2 cell culture**

147 The immortalised microglia cell line, BV2 (EP-CL-0493, Elabscience), was cultured in Rosewell Park  
148 Memorial Institute (RPMI) 1640 media containing 2mM L-glutamine (Gibco, Cat# 11875) containing  
149 0.1% gentamycin (Thermo, Cat# 15750060) and supplemented with heat-inactivated newborn calf

150 serum (NCS; Gibco, Cat# 26010-074) at a concentration of 10% for expansion and 5% when plated for  
151 experiments. All cells were from between passage numbers 5 and 10. Cells were plated at 45,000  
152 cells/mm<sup>2</sup> and treated 24 hours after plating. Here, cells were treated with 4μL of either phosphate-  
153 buffered saline (PBS; Gibco, Cat# 100100) to serve as a control (i.e., unstimulated cells) or interleukin-  
154 1β (IL-1β; 50ng/mL; Miltenyi Biotec, Cat#130-101-682) plus interferon-γ (IFNγ; 20ng/mL; Miltenyi  
155 Biotec, Cat# 130-105-785) to induce inflammation (i.e., immune activation). We based the cell  
156 culturing and immune activation techniques described here on established protocols from our lab [66-  
157 68]. After 1 hour of post-treatment with either PBS or IL-1β+ IFNγ, we applied a 10μL dose of either  
158 NTI-164 extract or CBD (1mg/mL), and we undertook the analysis at 24 hours post-treatment. As NTI-  
159 164 extract and CBD were dissolved in ethanol for this investigation, all control (PBS-treated) wells  
160 also contained a matched ethanol concentration of 0.1%. An independent replicate (n=1) is cells plated  
161 and treated from one stock flask per day.

162

### 163 **Neuronal SHSY-5Y cell culture**

164 The immortalised neural precursor cell line, SHSY-5Y (The American Type Culture Collection, Cat#  
165 CRL-2266), was used to assess the effect of NTI-164 or CBD treatment on either neuronal  
166 differentiation or in response to excitotoxic injury. For expansion, we cultured cells in Dulbecco's  
167 Modified Eagle Medium (DMEM, Gibco, Cat# 11995) that contained 1g/L D-glucose, 584mg/L L-  
168 glutamine, 110mg/L sodium pyruvate, and phenol red, further supplemented with 0.1% penicillin-  
169 streptomycin (Sigma-Aldrich, Cat# P4458) and 10% NCS. We plated SHSY-5Y cells at 45,000  
170 cells/mm<sup>2</sup> for experiments.

171 For work on differentiated cells, we altered the media to contain 1% NCS and daily delivery of 10uM  
172 all-trans-retinoic acid (Sigma-Aldrich, Cat#R2625 dissolved in PBS). Specifically, we differentiated  
173 the cells for five days with daily half-volume media changes before the excitotoxicity assays. We  
174 exposed the SHSY-5Y to 3 mM glutamate (Sigma-Aldrich, Cat# G815) dissolved in PBS, delivered as  
175 a 10uL dose. After 1 hour, cells were treated with NTI-164 or CBD as previously described for BV2

176 experiments, with analysis conducted 24 hours post-treatment. For undifferentiated culture conditions,  
177 cells were plated in DMEM as described above. An independent replicate (n=1) is cells plated and  
178 treated from one stock flask per day.

### 179 **Multiplex Cytokine/Chemokine Assay**

180 In separate sterile 96-well plates, 300uL of 10% bovine serum albumin (BSA) dissolved in PBS (BSA  
181 buffer) was added (to prevent any cytokine loss to the plastic), and we incubated plates for 30 minutes  
182 at room temperature, then discarded the contents, and air-dried the plates. We then used these protein-  
183 blocked plates to collect BV2 culture media at 24 hours following the initiation of the treatment  
184 protocol. Media was immediately centrifuged to remove particulate at 300G for 10 minutes with  
185 supernatant, then collected in an additional BSA-blocked plate and stored at -80°C until use in multiplex  
186 experiments. We measured the cytokine and chemokine levels in the media using a Bio-Plex 200 as per  
187 the manufacturer's instructions (Bio-Rad, Cat# M60000007A). Cytokines and chemokines measured  
188 included IL-2, IL-10, IL-5, GM-CSF, and TNF $\alpha$ , as per our previous work [69, 70]. We ran all samples  
189 in duplicate with data analysed via the Bio-Plex Manager software from BioRad.

190

### 191 **Immunohistochemistry**

192 Plated cells were fixed for 10 minutes with 2% paraformaldehyde (PFA; VWR Chemicals, Cat#  
193 28794.364) in phosphate buffer and washed for 3x5 minutes with PBS. All washes were for 3x5 minutes  
194 throughout the protocol. Plates were stored at 4°C in 150uL PBS containing 0.02% sodium azide  
195 (Sigma- Aldrich, Cat# S-2002). Immediately before staining, cells were washed and then incubated for  
196 30 minutes with 100uL of BSA buffer containing 0.01% Triton X (Sigma-Aldrich, Cat# X100).  
197 Following this, we removed the 75uL of BSA buffer and added 25uL of primary antibody diluted in  
198 PBS to obtain the final concentration, as detailed in Table 1. We incubated the plates overnight at 4°C  
199 and washed them the following day. Afterwards, 50uL of the corresponding fluorescent secondary  
200 antibody (see Table 1) was applied for 1 hour at room temperature and then washed. To visualise cell  
201 nuclei, 4',6-diamino-2-phenylindole (DAPI; Invitrogen, Cat# D21490) diluted 1:1000 in PBS was



202 applied for 15 minutes at room temperature with plates subsequently washed. For imaging,  
203 photomicrographs were taken using the EVOS M5000 (Invitrogen, Cat# AMF5000) in three fields of  
204 view per well from duplicate wells and analysed using Fiji 2 to determine the area coverage of each  
205 marker. We undertook the staining and analysis per our previous work [71, 72].

206

207 **Table 1. Primary and secondary antibodies**

208

| Antibody                                   | Concentration | Supplier                 |
|--------------------------------------------|---------------|--------------------------|
| Mouse $\alpha$ -ARG1                       | 1:250         | Abcam, Cat# AB239731     |
| <b>Rabbit <math>\alpha</math>-COX2</b>     | 1:500         | Abcam, Cat# AB15191      |
| Rabbit $\alpha$ -iNOS                      | 1:250         | Abcam, Cat# AB178945     |
| Mouse $\alpha$ -Beta III Tubulin           | 1:500         | R & D, Cat# MAB1195      |
| Goat $\alpha$ -Rabbit IgG, Alexa Fluor 555 | 1:500         | Invitrogen, Cat# A-21428 |
| Goat $\alpha$ -Mouse IgG, Alexa Fluor 488  | 1:500         | Invitrogen, Cat# A-11001 |

209 **Abbreviations.**  $\alpha$ -: anti; Arg-1: Arginase-1; COX-2: cyclooxygenase-2; IgG: Immunoglobulin G;  
210 iNOS: inducible nitric oxide synthase

211

212 **Cell Viability (Mitochondrial Activity) Assay**

213 We assessed mitochondrial activity using the 3-(4,5-dimethylthiazol-2-yl)-2,5-diphenyl-2H-  
214 tetrazolium bromide (MTT) assay (Sigma-Aldrich, Cat# M6494). As a tetrazolium dye, MTT is bio-  
215 reduced by the mitochondria into a formazan product that is insoluble in the tissue culture medium.  
216 Upon being dissolved, we quantified the formazan content via a colourimetric analysis. In brief, we  
217 added MTT to the wells at a final concentration of 250 $\mu$ g/mL. After 30 minutes, we carefully removed  
218 and discarded the media, then dissolved the formazan within the wells in dimethylsulfoxide (DMSO;  
219 Sigma-Aldrich, Cat# D2650) and absorbance measured at 490nm using a spectrophotometer (Glomax  
220 Multi+; Promega, UK).

221

222

## 223 **Statistics**

224 We averaged the data for replicates within experiments, and then data from at least three independent  
225 experiments was analysed using GraphPad Prism software (GraphPad Software, Inc.). We have outlined  
226 the replicate numbers for each experiment and the specifics of the statistics for each analysis in the  
227 figure legends. We expressed all data as mean  $\pm$  standard error of the mean (SEM) with significant  
228 differences between groups set at a p-value of less than 0.05 ( $P < 0.05$ )

229

## 230 **Results**

### 231 **Chemical characterisation of NTI-164 constituents by U-HPLC**

232 The U-HPLC analysis revealed that NTI-164 was rich in the acidic precursor of CBD, CBDA as the  
233 main constituent of the extract (up to 60% wt/wt). The extraction procedure also generated a solution  
234 of up to 14% wt/wt CBD, 0.44% wt/wt CBG, 0.06% CBDV and 0.08% wt/wt THC content. The HPLC  
235 chromatogram was recorded at 229 nm, and we have shown an example in Figure 1.

### 236 **Effect of NTI-164 on energy production and number of BV-2 microglia**

237 In unstimulated BV2 microglial cells (treated with PBS + EtOH excipient), NTI-164 or CBD treatment  
238 had no significant effect on mitochondrial activity as assessed via the MTT assay (Figure 2A). In line  
239 with prior findings, we observed that mitochondrial activity was significantly increased in immune-  
240 activated cells stimulated with IL-1 $\beta$ +IFN- $\gamma$  (+EtOH excipient). While NTI-164 prevented this  
241 increase, CBD was not (Figure 2B). In line with this, exposure to NTI-164 or CBD in unstimulated cells  
242 did not significantly alter overall cell number as assessed via area-coverage analysis of DAPI staining  
243 (Figure 2C). Interestingly, CBD significantly increased the area coverage of DAPI staining in immune-  
244 activated cells. We did not observe any impacts of NTI-164 treatment on DAPI staining in the immune-  
245 activated cells (Figure 2D).

246

247

### 248 **Effect of NTI-164 on the expression of inflammatory markers in BV-2 microglial**

249 In immune-activated microglia, NTI-164 treatment resulted in a significant decrease in the expression  
250 of inducible nitric oxide synthase and arginase-1, which was not observed in CBD-treated cells (Figure  
251 3A, B). Furthermore, NTI-164 and CBD were both able to significantly reduce the expression of COX-2  
252 from the immune-activated microglia (Figure 3C).

253

### 254 **Effects of NTI-164 on microglia cytokine production**

255 In immune-activated BV2 cells, treatment with NTI-164 or CBD led to no significant change in the  
256 levels of the anti-inflammatory cytokines IL-4 and IL-10 (Figure 4A, B). However, treatment with NTI-  
257 164 significantly reduced the expression of the growth and differentiation-inducing chemokine GM-  
258 CSF, but this finding was not observed in CBD-treated cells (Figure 4C). NTI-164 and CBD  
259 significantly decreased the production of the pro-inflammatory IL-2 (Figure 4D), with no significant  
260 alteration to levels of inflammatory cytokine IL-5. Finally, NTI-164 but not CBD was able to reduce  
261 levels of TNF $\alpha$  significantly (Figure 4F).

### 262 **Effect of NTI-164 and CBD on neuronal responses**

263 In undifferentiated neurons, NTI-164 treatment significantly increased the area coverage of DAPI  
264 staining, while CBD treatment resulted in no detectable change to DAPI staining (Figure 5A). However,  
265 neither treatment induced spontaneous differentiation as assessed via expression of Beta III Tubulin  
266 (Figure 5B). In differentiated neurons, neither NTI-164 nor CBD altered the number of cells or the  
267 amount of de-differentiation (Figure 5 C, D). In a paradigm of excitotoxicity, NTI-164 significantly  
268 increased the mitochondrial activity (survival) of neurons, while CBD could not rescue the  
269 mitochondrial activity (Figure 5E).

270

271

272

## 273 **Discussion**

274 The current study sought to determine the impact of a full-spectrum medicinal cannabis plant extract  
275 (NTI-164) using *in vitro* models of neuroinflammation and neuroinjury. In our study, NTI-164  
276 normalised inflammation-induced changes in immune-activated microglia cells by preventing increased  
277 mitochondrial activity and promoting the survival of differentiated neurons under excitotoxic  
278 conditions. As a common feature of neurodegenerative and neurodevelopmental disorders,  
279 neuroinflammation typically involves activation of resident immune cells of CNS (glia cells) and  
280 chronic production of cytokines together with reactive oxygen intermediates resulting in immune cell  
281 infiltration, excitotoxicity with subsequent damage cells and to the blood-brain-barrier integrity [73].  
282 In particular, consistent evidence supports the contribution of microglia-mediated neuroinflammatory  
283 response in the pathogenesis of ASD [74]. In children with ASD, an abnormal cytokine profile has been  
284 reported [75], with elevated levels of pro-inflammatory cytokines predominantly in children with more  
285 aberrant behaviours [76]. In parallel, the ECS is involved in modulating microglial phenotype and  
286 mediating inflammatory signalling pathways in neuropathology [77]. Compared to neurotypical  
287 children, an abnormal profile of ECS has been reported in the peripheral blood of children with ASD  
288 [41-43]

289 Phytocannabinoids or exogenous cannabinoids are abundant in the *Cannabis sativa* plant and have been  
290 found to influence microglia regulation of inflammatory response through various biological  
291 mechanisms [51, 52]. The therapeutic benefits of combined phytocannabinoids have been consistently  
292 demonstrated in several experimental models [52, 78-81] and clinical research studies [82], in particular  
293 for the treatment of ASD-related symptoms [56, 57, 83-85]. In an amyotrophic lateral sclerosis animal  
294 model, daily treatment of mice with a phytocannabinoid-enriched botanical extract (Sativex) for 20  
295 weeks resulted in a significant decrease in the progression of neurological impairment [81]. In another  
296 multiple sclerosis model, treatment with Sativex for ten days reduced microglial immune-related  
297 activity and expression of pro-inflammatory cytokines [80]. In a more recent experimental study, THC  
298 and CBD combination treatment (but not either compound alone) in a murine multiple sclerosis model

299 led to reduced levels of pro-inflammatory cytokines such as IL-6 and TNF- $\alpha$  while increasing  
300 production of anti-inflammatory cytokines [62]. The authors proposed the underlying anti-  
301 inflammatory and neuroprotective mechanism of the combined phytocannabinoids to involve cell cycle  
302 arrest, apoptosis and induction of anti-inflammatory cytokines in immune-activated brain cells through  
303 regulation of miRNA-mediated signalling pathways [62].

304 In this study, the full-spectrum cannabis extract NTI-164 effectively attenuated elevated mitochondria  
305 activity and normalising cell numbers in immune-activated microglia cells and CBD alone did not. We  
306 also found that NTI-164 was able to prevent the increase of inflammatory mediators TNF $\alpha$ , GM-CSF,  
307 iNOS and Arg-1 and significantly reduced their levels under inflammation-induced conditions.  
308 Microglial activation is an important neuroglial response to injury or any pathological event, as  
309 microglia are the chief cells engaged in immune surveillance [86]. Animal models and human studies  
310 consistently demonstrate an abnormal microglial function associated with ASD-related symptoms. In  
311 an inflammatory animal model, microglia activation resulted in ASD-like neurobehavioral deficit [87],  
312 which has been linked to impaired ECS signalling, including elevated levels of endocannabinoids and  
313 its metabolic enzymes in the amygdala region of the brain [88]. In children with ASD, studies have  
314 shown activation of microglia and altered inflammatory gene expressions in multiple brain regions,  
315 providing strong evidence supporting that neuroinflammation is involved in ASD pathogenesis [33, 34,  
316 89]. Evidence from a recent systematic review which revealed morphological alterations of activated  
317 microglia in various brain regions of individuals with ASD provides additional support for microglia-  
318 mediated neuroinflammation in the development of ASD [74]. Disruption in microglia function  
319 mediated by neuroactive substances can lead to marked neuronal impairment, contributing to neuronal  
320 dysfunction in neurodevelopmental disorders such as ASD [90]. Cannabis extracts may provide  
321 potential therapeutic benefits by targeting microglia-induced neuroinflammation in neuropathology.

322 Both NTI-164 and CBD significantly decreased IL-2 and COX-2 levels in immune-activated cells.  
323 Similarly, previous studies have shown that whole cannabis extract [91] and the acidic cannabidiol  
324 CBDA [92] exhibit anti-inflammatory effects by inhibiting COX-2 activity in cell culture. Notably,  
325 NTI-164 and CBD did not affect IL-5, IL-4 or IL-10 levels, which contrasts with previous studies

326 demonstrating changes in the production of these cytokines induced by CBD under inflammatory  
327 conditions [93]. The variability in our findings and previous studies could be due to the differences in  
328 physiological responses to cannabis extracts, such as bell-shaped dose or dose-dependent responses  
329 [94], which needs to be explored in future studies. The neuroprotective and anti-inflammatory profiles  
330 of NTI-164 will be further characterised using *in vivo* models of neuroinflammation.

331 Although the underlying positive mechanisms of phytocannabinoids are challenging to characterise due  
332 to the complexity and diversity of the pharmacodynamic profile, a number of mechanisms for  
333 attenuation of inflammation have been proposed. A recent study showed that the anti-inflammatory  
334 effect of CBD involved inhibiting oxidative stress-activated NF- $\kappa$ B-dependent signalling pathway  
335 through regulation of NADPH production and glucose uptake [95]. In addition to the potential  
336 modulation of intracellular antioxidant pathways, other pharmacological anti-inflammatory  
337 mechanisms include modulating calcium signalling [96] and through increased peroxisome proliferator-  
338 activated receptor  $\gamma$ -dependent activation [97].

339 Apart from its anti-inflammatory effect, NTI-164 treatment significantly increased the proliferation of  
340 neural progenitors and promoted the survival of neurons under a cytotoxic state, whereas CBD had no  
341 effect. Congruent with our findings, CBD alone did not enhance neural progenitor cell proliferation  
342 [98], which could either indicate the observed effect was due to botanical synergy or due to variability  
343 of CBD dose-response. However, Luján and Valverde (2020) suggest that CBD exerts pro-neurogenic  
344 effects only after the generation of newborn neurons [99]. Nevertheless, the effect of phytocannabinoids  
345 on neural progenitor cell proliferation requires further investigation. Several biological mechanisms  
346 involved in CBD-mediated neuroplasticity protection and survival have been investigated as candidates  
347 [100], including extracellular-signal-regulated kinases [101], glycogen synthase kinase 3 $\beta$  signalling  
348 [102, 103], and mammalian target of rapamycin pathways [104]. Given the interaction between  
349 phytocannabinoids and the ECS, molecular mechanisms underlying the synergistic effect of cannabis  
350 constituents on neurogenesis in preclinical models need further investigation.

351 Together, these findings suggest that the anti-inflammatory effect of NTI-164 is likely due to the  
352 synergistic interaction of the cannabis extract derivatives rather than isolated CBD supporting the

353 entourage effect of full-spectrum cannabis derivatives and suggesting a role for botanical synergy in the  
354 phenotypic transition of microglial cells. These results need to be confirmed and warrant further  
355 investigation of phytocannabinoid interaction in preclinical *in vivo* models to explore the potential for  
356 distinct effects of full-spectrum cannabis extracts compared to isolated compounds.

357

## 358 **Conclusions**

359 Preclinical studies set the foundation for designing clinical trials using medicinal cannabis extract to  
360 treat various neuropathologies. In this study, the anti-inflammatory and neuroprotective effects of the  
361 chemically characterised full-spectrum cannabis extract NTI-164 were explored in immune-activated  
362 cells. NTI-164 showed higher efficacy than isolated CBD in attenuating inflammatory cytokines and  
363 promoting neuronal survival in the cytotoxic paradigm. Overall, these findings provide additional  
364 support for full-spectrum medicinal cannabis plant extract as a valid and safe therapeutic intervention  
365 for treating ASD-related and other neurological disorders. The growing evidence for the therapeutic  
366 benefit of whole-plant cannabis extracts in treating complex neurological disorders, which require a  
367 multi-mechanistic approach, is promising and supports further research. Future studies need to  
368 characterise the effects of NTI-164 on key anti-inflammatory and immunomodulatory mechanisms  
369 involved in neurological pathogenesis and progression *in vivo*. Also, the synergistic effect of  
370 phytocannabinoids in modulation of microglial cell functions warrants further investigation. Further  
371 examination of the optimal dose of NTI-164 and treatment duration may also enhance efficacy and  
372 expected outcomes.

373

## 374 **Acknowledgements**

375 The supporting body played no role in the analysis or decision to publish this data.

376

377

378 **Figure Legends**

379 **Figure 1.** A representative HPLC chromatogram of the NTI-164 extract was recorded at 229 nm,  
380 according to the method used to analyse cannabinoids. Representing the main component, the CBD  
381 acidic precursor, CBDA eluted at 3.41 minutes, CBD eluted at 3.08 minutes, CBN at 4.57 minutes,  
382 THC at 5.35 minutes and THCA at 8.45 minutes. Abbreviations. CBD: cannabidiol; CBDA:  
383 Cannabidiolic acid; CBN: cannabinol, THCA: tetrahydrocannabinolic acid; THC: $\Delta$ 9-  
384 tetrahydrocannabinol

385 **Figure 2.** Effect of NTI-164 and CBD on MTT outputs in BV-2 microglia in **A)** unstimulated condition,  
386 **B)** immune-activated condition and overall DAPI-positive cell number in **C)** unstimulated condition,  
387 **D)** immune-activated condition. Data expressed as Mean  $\pm$  SEM, n=6-10. Significance set at \*, p<0.05;  
388 \*\*, p<0.01; \*\*\*, p<0.001.

389 **Figure 3.** Effect of NTI-164 and CBD on the expression of inflammatory markers in BV-2 microglia  
390 cells. **A)** inducible-nitric oxide synthase (iNOS), **B)** arginase-1 (Arg1), and **C)** cyclo-oxygenase-2  
391 (COX2) protein expression normalised to DAPI-positive cell number in the control (PBS only) group.  
392 Data expressed as Mean  $\pm$  SEM, n=6-8. Significance set at \*, p<0.05; \*\*, p<0.01; \*\*\*, p<0.001.

393 **Figure 4.** Impact of NTI-164 and CBD on inflammation-induced cytokine release from BV2 microglia.  
394 In **A)** interleukin-4 (IL-4), **B)** interleukin-10 (IL-10), **C)** Granulocyte-macrophage colony-stimulating  
395 factor (GM-CSF), **D)** interleukin-2 (IL-2), **E)** interleukin-5 (IL-5) and **F)** tumour necrosis factor-alpha  
396 (TNF- $\alpha$ ) analysed by multiplex immunoassay and expressed as fluorescent units. Mean  $\pm$  SEM, n=6-7.  
397 Significance set at \*, p<0.05; \*\*, p<0.01; \*\*\*, p<0.001.

398 **Figure 5.** Impacts of NTI-164 and CBD on SHSY-5Y neurons. In **A)** impacts on numbers of DAPI-  
399 positive cells in undifferentiated cultures, and in **B)** impacts on the expression of beta-tubulin (BTUB)  
400 as a proportion of DAPI-positive cells as an indicator of spontaneous differentiation in undifferentiated  
401 cells. In **C)** impacts on numbers of DAPI-positive cells in differentiated cultures, and in **D)** impacts on  
402 BTUB expression in differentiated cells, and **E)** impacts on the MTT outputs (mitochondrial activity



403 assay) in differentiated cells in the glutamate exposure excitotoxicity assay. Mean  $\pm$  SEM, n=6-10.

404 Significance set at \*,  $p < 0.05$ ; \*\*,  $p < 0.01$ ; \*\*\*,  $p < 0.001$ .

405 **References**

- 406 1. Ouellette J, Lacoste B. From Neurodevelopmental to Neurodegenerative Disorders: The  
407 Vascular Continuum. *Front Aging Neurosci.* 2021;13. doi: 10.3389/fnagi.2021.749026.
- 408 2. Bjorklund G, Saad K, Chirumbolo S, Kern JK, Geier DA, Geier MR, et al. Immune  
409 dysfunction and neuroinflammation in autism spectrum disorder. *Acta Neurobiol Exp (Wars).*  
410 2016;76(4):257-68. Epub 2017/01/18. doi: 10.21307/ane-2017-025. PubMed PMID: 28094817.
- 411 3. Xiong Y, Chen J, Li Y. Microglia and astrocytes underlie neuroinflammation and synaptic  
412 susceptibility in autism spectrum disorder. *Front Neurosci.* 2023;17:1125428. Epub 2023/04/07. doi:  
413 10.3389/fnins.2023.1125428. PubMed PMID: 37021129; PubMed Central PMCID:  
414 PMCPMC10067592.
- 415 4. Lukens JR, Eyo UB. Microglia and neurodevelopmental disorders. *Annual Review of*  
416 *Neuroscience.* 2022;45:425-45.
- 417 5. Gzielo K, Nikiforuk A. Astroglia in Autism Spectrum Disorder. *Int J Mol Sci.* 2021;22(21).  
418 doi: 10.3390/ijms222111544. PubMed PMID: 34768975.
- 419 6. Petrelli F, Pucci L, Bezzi P. Astrocytes and Microglia and Their Potential Link with Autism  
420 Spectrum Disorders. *Front Cell Neurosci.* 2016;10:21. Epub 2016/02/24. doi:  
421 10.3389/fncel.2016.00021. PubMed PMID: 26903806; PubMed Central PMCID: PMCPMC4751265.
- 422 7. Lord C, Brugha TS, Charman T, Cusack J, Dumas G, Frazier T, et al. Autism spectrum  
423 disorder. *Nat Rev Dis Primers.* 2020;6(1):1-23.
- 424 8. Simonoff E, Pickles A, Charman T, Chandler S, Loucas T, Baird G. Psychiatric disorders in  
425 children with autism spectrum disorders: prevalence, comorbidity, and associated factors in a  
426 population-derived sample. *J Am Acad Child Adolesc Psychiatry.* 2008;47(8):921-9.
- 427 9. Kang L, Liu J, Liu Y, Liang W, Yang F, Liu M. Global, regional, and national disease burden  
428 of autism spectrum disorder among children under 5 years from 1990 to 2019: An analysis for the

- 429 Global Burden of Disease 2019 Study. *Asian Journal of Psychiatry*. 2023;79:103359. doi:  
430 <https://doi.org/10.1016/j.ajp.2022.103359>.
- 431 10. Salari N, Rasoulpoor S, Rasoulpoor S, Shohaimi S, Jafarpour S, Abdoli N, et al. The global  
432 prevalence of autism spectrum disorder: a comprehensive systematic review and meta-analysis. *Ital J*  
433 *Pediatr* 2022;48(1):1-16.
- 434 11. Bieleninik Ł, Gold C. Estimating components and costs of standard care for children with  
435 autism spectrum disorder in Europe from a large international sample. *Brain Sci*. 2021;11(3):340.
- 436 12. Cakir J, Frye RE, Walker SJ. The lifetime social cost of autism: 1990–2029. *Res Autism*  
437 *Spectr Disord*. 2020;72:101502. doi: 10.1016/j.rasd.2019.101502.
- 438 13. Scuderi C, Verkhatsky A. The role of neuroglia in autism spectrum disorders. *Prog Mol Biol*  
439 *Transl Sci*. 2020;173:301-30. Epub 2020/07/28. doi: 10.1016/bs.pmbts.2020.04.011. PubMed PMID:  
440 32711814.
- 441 14. Newschaffer CJ, Fallin D, Lee NL. Heritable and nonheritable risk factors for autism  
442 spectrum disorders. *Epidemiol Rev*. 2002;24(2):137-53. Epub 2003/05/24. doi:  
443 10.1093/epirev/mxf010. PubMed PMID: 12762089.
- 444 15. Cheroni C, Caporale N, Testa G. Autism spectrum disorder at the crossroad between genes  
445 and environment: contributions, convergences, and interactions in ASD developmental  
446 pathophysiology. *Mol Autism*. 2020;11(1):69. doi: 10.1186/s13229-020-00370-1.
- 447 16. Jeste SS, Geschwind DH. Disentangling the heterogeneity of autism spectrum disorder  
448 through genetic findings. *Nat Rev Neurol*. 2014;10(2):74-81. Epub 2014/01/29. doi:  
449 10.1038/nrneurol.2013.278. PubMed PMID: 24468882; PubMed Central PMCID:  
450 PMC4125617.
- 451 17. Persico AM, Ricciardello A, Lamberti M, Turriziani L, Cucinotta F, Brogna C, et al. The  
452 pediatric psychopharmacology of autism spectrum disorder: A systematic review - Part I: The past

- 453 and the present. *Prog Neuropsychopharmacol Biol Psychiatry*. 2021;110:110326. doi:  
454 <https://doi.org/10.1016/j.pnpbp.2021.110326>.
- 455 18. Edgcomb JB, Zima B. Medication Adherence Among Children and Adolescents with Severe  
456 Mental Illness: A Systematic Review and Meta-Analysis. *J Child Adolesc Psychopharmacol*.  
457 2018;28(8):508-20. Epub 2018/07/25. doi: 10.1089/cap.2018.0040. PubMed PMID: 30040434.
- 458 19. Menassa DA, Gomez-Nicola D. Microglial Dynamics During Human Brain Development.  
459 *Front Immunol*. 2018;9:1014. Epub 2018/06/09. doi: 10.3389/fimmu.2018.01014. PubMed PMID:  
460 29881376; PubMed Central PMCID: PMC5976733.
- 461 20. Bystron I, Blakemore C, Rakic P. Development of the human cerebral cortex: Boulder  
462 Committee revisited. *Nat Rev Neurosci*. 2008;9(2):110-22. Epub 2008/01/23. doi: 10.1038/nrn2252.  
463 PubMed PMID: 18209730.
- 464 21. Kwon HS, Koh SH. Neuroinflammation in neurodegenerative disorders: the roles of  
465 microglia and astrocytes. *Transl Neurodegener*. 2020;9(1):42. doi: 10.1186/s40035-020-00221-2.  
466 PubMed PMID: 33239064.
- 467 22. Zeidán-Chuliá F, Salmina AB, Malinovskaya NA, Noda M, Verkhatsky A, Moreira JC. The  
468 glial perspective of autism spectrum disorders. *Neurosci Biobehav Rev*. 2014;38:160-72. Epub  
469 2013/12/05. doi: 10.1016/j.neubiorev.2013.11.008. PubMed PMID: 24300694.
- 470 23. Hanisch U-K, Kettenmann H. Microglia: active sensor and versatile effector cells in the  
471 normal and pathologic brain. *Nature Neuroscience*. 2007;10(11):1387-94. doi: 10.1038/nn1997.
- 472 24. Paolicelli RC, Sierra A, Stevens B, Tremblay ME, Aguzzi A, Ajami B, et al. Microglia states  
473 and nomenclature: A field at its crossroads. *Neuron*. 2022;110(21):3458-83. Epub 2022/11/04. doi:  
474 10.1016/j.neuron.2022.10.020. PubMed PMID: 36327895; PubMed Central PMCID:  
475 PMCPMC9999291.

- 476 25. Matta SM, Moore Z, Walker FR, Hill-Yardin EL, Crack PJ. An altered glial phenotype in the  
477 NL3(R451C) mouse model of autism. *Sci Rep.* 2020;10(1):14492. Epub 2020/09/04. doi:  
478 10.1038/s41598-020-71171-y. PubMed PMID: 32879325; PubMed Central PMCID:  
479 PMCPMC7468159.
- 480 26. Bronzuoli MR, Facchinetti R, Ingrassia D, Sarvadio M, Schiavi S, Steardo L, et al. Neuroglia  
481 in the autistic brain: evidence from a preclinical model. *Mol Autism.* 2018;9:66. Epub 2019/01/04.  
482 doi: 10.1186/s13229-018-0254-0. PubMed PMID: 30603062; PubMed Central PMCID:  
483 PMCPMC6307226.
- 484 27. Zhan Y, Paolicelli RC, Sforazzini F, Weinhard L, Bolasco G, Pagani F, et al. Deficient  
485 neuron-microglia signaling results in impaired functional brain connectivity and social behavior.  
486 *Nature Neuroscience.* 2014;17(3):400-6. doi: 10.1038/nn.3641.
- 487 28. Vargas DL, Nascimbene C, Krishnan C, Zimmerman AW, Pardo CA. Neuroglial activation  
488 and neuroinflammation in the brain of patients with autism. *Ann Neurol.* 2005;57(1):67-81. Epub  
489 2004/11/17. doi: 10.1002/ana.20315. PubMed PMID: 15546155.
- 490 29. Suzuki K, Sugihara G, Ouchi Y, Nakamura K, Futatsubashi M, Takebayashi K, et al.  
491 Microglial activation in young adults with autism spectrum disorder. *JAMA Psychiatry.*  
492 2013;70(1):49-58. doi: 10.1001/jamapsychiatry.2013.272. PubMed PMID: 23404112.
- 493 30. Morgan JT, Chana G, Abramson I, Semendeferi K, Courchesne E, Everall IP. Abnormal  
494 microglial-neuronal spatial organization in the dorsolateral prefrontal cortex in autism. *Brain Res.*  
495 2012;1456:72-81. doi: 10.1016/j.brainres.2012.03.036. PubMed PMID: 22516109.
- 496 31. Tetreault NA, Hakeem AY, Jiang S, Williams BA, Allman E, Wold BJ, et al. Microglia in the  
497 cerebral cortex in autism. *J Autism Dev Disord.* 2012;42(12):2569-84. Epub 2012/04/03. doi:  
498 10.1007/s10803-012-1513-0. PubMed PMID: 22466688.

- 499 32. Morgan JT, Chana G, Pardo CA, Achim C, Semendeferi K, Buckwalter J, et al. Microglial  
500 activation and increased microglial density observed in the dorsolateral prefrontal cortex in autism.  
501 Biol Psychiatry. 2010;68(4):368-76. doi: 10.1016/j.biopsych.2010.05.024. PubMed PMID: 20674603.
- 502 33. Tsilioni I, Pantazopoulos H, Conti P, Leeman SE, Theoharides TC. IL-38 inhibits microglial  
503 inflammatory mediators and is decreased in amygdala of children with autism spectrum disorder. Proc  
504 Natl Acad Sci U S A. 2020;117(28):16475-80. Epub 2020/07/01. doi: 10.1073/pnas.2004666117.  
505 PubMed PMID: 32601180; PubMed Central PMCID: PMC7368277.
- 506 34. Tsilioni I, Patel AB, Pantazopoulos H, Berretta S, Conti P, Leeman SE, et al. IL-37 is  
507 increased in brains of children with autism spectrum disorder and inhibits human microglia stimulated  
508 by neurotensin. Proc Natl Acad Sci U S A. 2019;116(43):21659-65. Epub 2019/10/09. doi:  
509 10.1073/pnas.1906817116. PubMed PMID: 31591201; PubMed Central PMCID: PMC6815178.
- 510 35. Melis M, Greco B, Tonini R. Interplay between synaptic endocannabinoid signaling and  
511 metaplasticity in neuronal circuit function and dysfunction. Eur J Neurosci. 2014;39(7):1189-201.  
512 Epub 2014/04/10. doi: 10.1111/ejn.12501. PubMed PMID: 24712998.
- 513 36. Wei D, Lee D, Cox CD, Karsten CA, Peñagarikano O, Geschwind DH, et al.  
514 Endocannabinoid signaling mediates oxytocin-driven social reward. Proc Natl Acad Sci U S A.  
515 2015;112(45):14084-9. Epub 2015/10/28. doi: 10.1073/pnas.1509795112. PubMed PMID: 26504214;  
516 PubMed Central PMCID: PMC4653148.
- 517 37. Haspula D, Clark MA. Cannabinoid Receptors: An Update on Cell Signaling,  
518 Pathophysiological Roles and Therapeutic Opportunities in Neurological, Cardiovascular, and  
519 Inflammatory Diseases. International Journal of Molecular Sciences. 2020;21(20):7693. PubMed  
520 PMID: doi:10.3390/ijms21207693.
- 521 38. Pietropaolo S, Marsicano G. The role of the endocannabinoid system as a therapeutic target  
522 for autism spectrum disorder: Lessons from behavioral studies on mouse models. Neurosci Biobehav

- 523 Rev. 2022;132:664-78. Epub 2021/11/24. doi: 10.1016/j.neubiorev.2021.11.031. PubMed PMID:  
524 34813825.
- 525 39. Zamberletti E, Gabaglio M, Woolley-Roberts M, Bingham S, Rubino T, Parolaro D.  
526 Cannabidiol Treatment Ameliorates Autism-Like Behaviors and Restores Hippocampal  
527 Endocannabinoid System and Glia Alterations Induced by Prenatal Valproic Acid Exposure in Rats.  
528 Front Cell Neurosci. 2019;13:367. Epub 2019/08/27. doi: 10.3389/fncel.2019.00367. PubMed PMID:  
529 31447649; PubMed Central PMCID: PMC6696797.
- 530 40. Kerr DM, Downey L, Conboy M, Finn DP, Roche M. Alterations in the endocannabinoid  
531 system in the rat valproic acid model of autism. Behav Brain Res. 2013;249:124-32. Epub  
532 2013/05/07. doi: 10.1016/j.bbr.2013.04.043. PubMed PMID: 23643692.
- 533 41. Siniscalco D, Sapone A, Giordano C, Cirillo A, de Magistris L, Rossi F, et al. Cannabinoid  
534 receptor type 2, but not type 1, is up-regulated in peripheral blood mononuclear cells of children  
535 affected by autistic disorders. J Autism Dev Disord. 2013;43(11):2686-95. Epub 2013/04/16. doi:  
536 10.1007/s10803-013-1824-9. PubMed PMID: 23585028.
- 537 42. Aran A, Eylon M, Harel M, Polianski L, Nemirovski A, Tepper S, et al. Lower circulating  
538 endocannabinoid levels in children with autism spectrum disorder. Mol Autism. 2019;10(1):2. doi:  
539 10.1186/s13229-019-0256-6.
- 540 43. Karhson DS, Krasinska KM, Dallaire JA, Libove RA, Phillips JM, Chien AS, et al. Plasma  
541 anandamide concentrations are lower in children with autism spectrum disorder. Mol Autism.  
542 2018;9:18. Epub 2018/03/23. doi: 10.1186/s13229-018-0203-y. PubMed PMID: 29564080; PubMed  
543 Central PMCID: PMC6696797.
- 544 44. Hill AJ, Williams CM, Whalley BJ, Stephens GJ. Phytocannabinoids as novel therapeutic  
545 agents in CNS disorders. Pharmacol Ther. 2012;133(1):79-97. doi:  
546 10.1016/j.pharmthera.2011.09.002. PubMed PMID: 21924288.

- 547 45. Graczyk M, Lewandowska AA, Dzierżanowski T. The Therapeutic Potential of Cannabis in  
548 Counteracting Oxidative Stress and Inflammation. *Molecules*. 2021;26(15). doi:  
549 10.3390/molecules26154551. PubMed PMID: 34361704; PubMed Central PMCID:  
550 PMCPMC8347461.
- 551 46. Esposito G, Pesce M, Seguela L, Sanseverino W, Lu J, Corpetti C, et al. The potential of  
552 cannabidiol in the COVID-19 pandemic. *Br J Pharmacol*. 2020;177(21):4967-70. doi:  
553 10.1111/bph.15157. PubMed PMID: 32519753; PubMed Central PMCID: PMCPMC7300643.
- 554 47. Tadijan A, Vlašić I, Vlainić J, Đikić D, Oršolić N, Jazvinščak Jembrek M. Intracellular  
555 Molecular Targets and Signaling Pathways Involved in Antioxidative and Neuroprotective Effects of  
556 Cannabinoids in Neurodegenerative Conditions. *Antioxidants* [Internet]. 2022; 11(10).
- 557 48. Arnold JC, McCartney D, Suraev A, McGregor IS. The safety and efficacy of low oral doses  
558 of cannabidiol: An evaluation of the evidence. *Clinical and translational science*. 2023;16(1):10-30.
- 559 49. Chesney E, Oliver D, Green A, Sovi S, Wilson J, Englund A, et al. Adverse effects of  
560 cannabidiol: a systematic review and meta-analysis of randomized clinical trials.  
561 *Neuropsychopharmacology*. 2020;45(11):1799-806. Epub 2020/04/09. doi: 10.1038/s41386-020-  
562 0667-2. PubMed PMID: 32268347; PubMed Central PMCID: PMCPMC7608221.
- 563 50. Larsen C, Shahinas J. Dosage, Efficacy and Safety of Cannabidiol Administration in Adults:  
564 A Systematic Review of Human Trials. *J Clin Med Res*. 2020;12(3):129-41. Epub 2020/04/02. doi:  
565 10.14740/jocmr4090. PubMed PMID: 32231748; PubMed Central PMCID: PMCPMC7092763.
- 566 51. Landucci E, Mazzantini C, Lana D, Calvani M, Magni G, Giovannini MG, et al. Cannabidiol  
567 inhibits microglia activation and mitigates neuronal damage induced by kainate in an in-vitro seizure  
568 model. *Neurobiol Dis*. 2022;174:105895. Epub 2022/10/15. doi: 10.1016/j.nbd.2022.105895. PubMed  
569 PMID: 36240948.



- 570 52. Martín-Moreno AM, Reigada D, Ramírez BG, Mechoulam R, Innamorato N, Cuadrado A, et  
571 al. Cannabidiol and other cannabinoids reduce microglial activation in vitro and in vivo: relevance to  
572 Alzheimer's disease. *Molecular pharmacology*. 2011;79(6):964-73.
- 573 53. Kozela E, Pietr M, Juknat A, Rimmerman N, Levy R, Vogel Z. Cannabinoids  $\Delta^9$ -  
574 tetrahydrocannabinol and cannabidiol differentially inhibit the lipopolysaccharide-activated NF- $\kappa$ B  
575 and interferon- $\beta$ /STAT proinflammatory pathways in BV-2 microglial cells. *Journal of biological*  
576 *chemistry*. 2010;285(3):1616-26.
- 577 54. Wu J, Chen N, Liu Y, Godlewski G, Kaplan HJ, Shrader SH, et al. Studies of involvement of  
578 G-protein coupled receptor-3 in cannabidiol effects on inflammatory responses of mouse primary  
579 astrocytes and microglia. *PLoS One*. 2021;16(5):e0251677. Epub 2021/05/14. doi:  
580 10.1371/journal.pone.0251677. PubMed PMID: 33984046; PubMed Central PMCID:  
581 PMCPMC8118243.
- 582 55. Aran A, Harel M, Cassuto H, Polyansky L, Schnapp A, Wattad N, et al. Cannabinoid  
583 treatment for autism: a proof-of-concept randomized trial. *Molecular autism*. 2021;12(1):1-11.
- 584 56. Aran A, Cassuto H, Lubotzky A, Wattad N, Hazan E. Brief report: cannabidiol-rich cannabis  
585 in children with autism spectrum disorder and severe behavioral problems—a retrospective feasibility  
586 study. *Journal of Autism and Developmental Disorders*. 2019;49(3):1284-8.
- 587 57. Fleury-Teixeira P, Caixeta FV, Ramires da Silva LC, Brasil-Neto JP, Malcher-Lopes R.  
588 Effects of CBD-Enriched Cannabis sativa Extract on Autism Spectrum Disorder Symptoms: An  
589 Observational Study of 18 Participants Undergoing Compassionate Use. *Front Neurol*. 2019;10:1145.  
590 Epub 2019/11/19. doi: 10.3389/fneur.2019.01145. PubMed PMID: 31736860; PubMed Central  
591 PMCID: PMCPMC6834767.
- 592 58. Barchel D, Stolar O, De-Haan T, Ziv-Baran T, Saban N, Fuchs DO, et al. Oral Cannabidiol  
593 Use in Children With Autism Spectrum Disorder to Treat Related Symptoms and Co-morbidities.

- 594 Front Pharmacol. 2019;9:1521. doi: 10.3389/fphar.2018.01521. PubMed PMID: 30687090; PubMed  
595 Central PMCID: PMC6333745.
- 596 59. Ben-Shabat S, Fride E, Sheskin T, Tamiri T, Rhee MH, Vogel Z, et al. An entourage effect:  
597 inactive endogenous fatty acid glycerol esters enhance 2-arachidonoyl-glycerol cannabinoid activity.  
598 Eur J Pharmacol. 1998;353(1):23-31. doi: 10.1016/s0014-2999(98)00392-6. PubMed PMID:  
599 9721036.
- 600 60. Samarut É, Nixon J, Kundap UP, Drapeau P, Ellis LD. Single and Synergistic Effects of  
601 Cannabidiol and  $\Delta$ -9-Tetrahydrocannabinol on Zebrafish Models of Neuro-Hyperactivity. Front  
602 Pharmacol. 2019;10:226. Epub 2019/04/06. doi: 10.3389/fphar.2019.00226. PubMed PMID:  
603 30949046; PubMed Central PMCID: PMC6435997.
- 604 61. Al-Ghezi ZZ, Busbee PB, Alghetaa H, Nagarkatti PS, Nagarkatti M. Combination of  
605 cannabinoids, delta-9-tetrahydrocannabinol (THC) and cannabidiol (CBD), mitigates experimental  
606 autoimmune encephalomyelitis (EAE) by altering the gut microbiome. Brain Behav Immun.  
607 2019;82:25-35. Epub 2019/07/30. doi: 10.1016/j.bbi.2019.07.028. PubMed PMID: 31356922;  
608 PubMed Central PMCID: PMC6866665.
- 609 62. Al-Ghezi ZZ, Miranda K, Nagarkatti M, Nagarkatti PS. Combination of Cannabinoids,  $\Delta$ 9-  
610 Tetrahydrocannabinol and Cannabidiol, Ameliorates Experimental Multiple Sclerosis by Suppressing  
611 Neuroinflammation Through Regulation of miRNA-Mediated Signaling Pathways. Front Immunol.  
612 2019;10:1921. Epub 2019/09/10. doi: 10.3389/fimmu.2019.01921. PubMed PMID: 31497013;  
613 PubMed Central PMCID: PMC6712515.
- 614 63. Blasco-Benito S, Seijo-Vila M, Caro-Villalobos M, Tundidor I, Andradas C, García-Taboada  
615 E, et al. Appraising the "entourage effect": Antitumor action of a pure cannabinoid versus a botanical  
616 drug preparation in preclinical models of breast cancer. Biochem Pharmacol. 2018;157:285-93. Epub  
617 2018/06/26. doi: 10.1016/j.bcp.2018.06.025. PubMed PMID: 29940172.

- 618 64. Anis O, Vinayaka AC, Shalev N, Namdar D, Nadarajan S, Anil SM, et al. Cannabis-Derived  
619 Compounds Cannabichromene and  $\Delta^9$ -Tetrahydrocannabinol Interact and Exhibit Cytotoxic Activity  
620 against Urothelial Cell Carcinoma Correlated with Inhibition of Cell Migration and Cytoskeleton  
621 Organization. *Molecules*. 2021;26(2). Epub 2021/01/23. doi: 10.3390/molecules26020465. PubMed  
622 PMID: 33477303; PubMed Central PMCID: PMCPMC7830447.
- 623 65. Shalev N, Kendall M, Anil SM, Tiwari S, Peeri H, Kumar N, et al. Phytocannabinoid  
624 Compositions from Cannabis Act Synergistically with PARP1 Inhibitor against Ovarian Cancer Cells  
625 In Vitro and Affect the Wnt Signaling Pathway. *Molecules*. 2022;27(21). Epub 2022/11/12. doi:  
626 10.3390/molecules27217523. PubMed PMID: 36364346; PubMed Central PMCID:  
627 PMCPMC9653955.
- 628 66. Fleiss B, Chhor V, Rajudin N, Lebon S, Hagberg H, Gressens P, et al. The Anti-Inflammatory  
629 Effects of the Small Molecule Pifithrin-micro on BV2 Microglia. *Dev Neurosci*. 2015;37(4-5):363-75.  
630 doi: 10.1159/000370031. PubMed PMID: 25721106; PubMed Central PMCID: PMCPMC5079065.
- 631 67. Van Steenwinckel J, Schang AL, Krishnan ML, Degos V, Delahaye-Duriez A, Bokobza C, et  
632 al. Decreased microglial Wnt/beta-catenin signalling drives microglial pro-inflammatory activation in  
633 the developing brain. *Brain*. 2019;142(12):3806-33. Epub 2019/10/31. doi: 10.1093/brain/awz319.  
634 PubMed PMID: 31665242; PubMed Central PMCID: PMCPMC6906599.
- 635 68. Dean JM, Wang X, Kaindl AM, Gressens P, Fleiss B, Hagberg H, et al. Microglial MyD88  
636 signaling regulates acute neuronal toxicity of LPS-stimulated microglia in vitro. *Brain Behav Immun*.  
637 2010;24(5):776-83. Epub 2009/11/12. doi: 10.1016/j.bbi.2009.10.018. PubMed PMID: 19903519.
- 638 69. Fleiss B, Nilsson MK, Blomgren K, Mallard C. Neuroprotection by the histone deacetylase  
639 inhibitor trichostatin A in a model of lipopolysaccharide-sensitized neonatal hypoxic-ischaemic brain  
640 injury. *J Neuroinflammation*. 2012;9(1):70. Epub 2012/04/20. doi: 10.1186/1742-2094-9-70. PubMed  
641 PMID: 22512781; PubMed Central PMCID: PMCPMC3420244.

- 642 70. Favrais G, van de Looij Y, Fleiss B, Ramanantsoa N, Bonnin P, Stoltenburg-Didinger G, et  
643 al. Systemic inflammation disrupts the developmental program of white matter. *Ann Neurol*.  
644 2011;70(4):550-65. Epub 2011/07/29. doi: 10.1002/ana.22489. PubMed PMID: 21796662.
- 645 71. Fleiss B, Coleman HA, Castillo-Melendez M, Ireland Z, Walker DW, Parkington HC. Effects  
646 of birth asphyxia on neonatal hippocampal structure and function in the spiny mouse. *Int J Dev*  
647 *Neurosci*. 2011;29(7):757-66. Epub 2011/06/07. doi: 10.1016/j.ijdevneu.2011.05.006. PubMed  
648 PMID: 21641987.
- 649 72. Chhor V, Le Charpentier T, Lebon S, Ore MV, Celador IL, Josserand J, et al.  
650 Characterization of phenotype markers and neuronotoxic potential of polarised primary microglia in  
651 vitro. *Brain Behav Immun*. 2013;32:70-85. Epub 2013/03/05. doi: 10.1016/j.bbi.2013.02.005.  
652 PubMed PMID: 23454862; PubMed Central PMCID: PMC3694309.
- 653 73. Kasatkina LA, Rittchen S, Sturm EM. Neuroprotective and Immunomodulatory Action of the  
654 Endocannabinoid System under Neuroinflammation. *International Journal of Molecular Sciences*.  
655 2021;22(11):5431. PubMed PMID: doi:10.3390/ijms22115431.
- 656 74. Liao X, Yang J, Wang H, Li Y. Microglia mediated neuroinflammation in autism spectrum  
657 disorder. *J Psychiatr Res*. 2020;130:167-76. Epub 2020/08/22. doi: 10.1016/j.jpsychires.2020.07.013.  
658 PubMed PMID: 32823050.
- 659 75. Zhao H, Zhang H, Liu S, Luo W, Jiang Y, Gao J. Association of Peripheral Blood Levels of  
660 Cytokines With Autism Spectrum Disorder: A Meta-Analysis. *Front Psychiatry*. 2021;12:670200. doi:  
661 10.3389/fpsyt.2021.670200. PubMed PMID: 34276441; PubMed Central PMCID:  
662 PMC8283413.
- 663 76. Ashwood P, Krakowiak P, Hertz-Picciotto I, Hansen R, Pessah I, Van de Water J. Elevated  
664 plasma cytokines in autism spectrum disorders provide evidence of immune dysfunction and are  
665 associated with impaired behavioral outcome. *Brain Behav Immun*. 2011;25(1):40-5. doi:  
666 10.1016/j.bbi.2010.08.003. PubMed PMID: 20705131; PubMed Central PMCID: PMC2991432.

- 667 77. Tanaka M, Sackett S, Zhang Y. Endocannabinoid Modulation of Microglial Phenotypes in  
668 Neuropathology. *Front Neurol.* 2020;11:87. Epub 2020/03/03. doi: 10.3389/fneur.2020.00087.  
669 PubMed PMID: 32117037; PubMed Central PMCID: PMC7033501.
- 670 78. Furgiuele A, Cosentino M, Ferrari M, Marino F. Immunomodulatory Potential of Cannabidiol  
671 in Multiple Sclerosis: a Systematic Review. *J Neuroimmune Pharmacol.* 2021;16(2):251-69. Epub  
672 2021/01/26. doi: 10.1007/s11481-021-09982-7. PubMed PMID: 33492630; PubMed Central PMCID:  
673 PMC7829325.
- 674 79. Maayah ZH, Takahara S, Ferdaoussi M, Dyck JR. The molecular mechanisms that underpin  
675 the biological benefits of full-spectrum cannabis extract in the treatment of neuropathic pain and  
676 inflammation. *Biochimica Et Biophysica Acta (BBA)-Molecular Basis Of Disease.*  
677 2020;1866(7):165771.
- 678 80. Feliú A, Moreno-Martet M, Mecha M, Carrillo-Salinas FJ, de Lago E, Fernández-Ruiz J, et  
679 al. A Sativex(®) -like combination of phytocannabinoids as a disease-modifying therapy in a viral  
680 model of multiple sclerosis. *Br J Pharmacol.* 2015;172(14):3579-95. Epub 2015/04/11. doi:  
681 10.1111/bph.13159. PubMed PMID: 25857324; PubMed Central PMCID: PMC4507161.
- 682 81. Moreno-Martet M, Espejo-Porras F, Fernández-Ruiz J, de Lago E. Changes in  
683 endocannabinoid receptors and enzymes in the spinal cord of SOD1(G93A) transgenic mice and  
684 evaluation of a Sativex(®) -like combination of phytocannabinoids: interest for future therapies in  
685 amyotrophic lateral sclerosis. *CNS Neurosci Ther.* 2014;20(9):809-15. Epub 2014/04/08. doi:  
686 10.1111/cns.12262. PubMed PMID: 24703394; PubMed Central PMCID: PMC6493201.
- 687 82. Sorosina M, Clarelli F, Ferrè L, Osiceanu AM, Unal NT, Mascia E, et al. Clinical response to  
688 Nabiximols correlates with the downregulation of immune pathways in multiple sclerosis. *Eur J*  
689 *Neurol.* 2018;25(7):934-e70. Epub 2018/03/13. doi: 10.1111/ene.13623. PubMed PMID: 29528549.

- 690 83. Hacoen M, Stolar OE, Berkovitch M, Elkana O, Kohn E, Hazan A, et al. Children and  
691 adolescents with ASD treated with CBD-rich cannabis exhibit significant improvements particularly  
692 in social symptoms: an open label study. *Translational Psychiatry*. 2022;12(1):375.
- 693 84. da Silva Junior EA, Medeiros WMB, Dos Santos JPM, de Sousa JMM, da Costa FB, Pontes  
694 KM, et al. Evaluation of the efficacy and safety of cannabidiol-rich cannabis extract in children with  
695 autism spectrum disorder: randomized, double-blind and controlled placebo clinical trial. *Trends in*  
696 *Psychiatry and Psychotherapy*. 2022;(AheadOfPrint):0-.
- 697 85. Bar-Lev Schleider L, Mechoulam R, Saban N, Meiri G, Novack V. Real life experience of  
698 medical cannabis treatment in autism: analysis of safety and efficacy. *Scientific reports*. 2019;9(1):1-  
699 7.
- 700 86. Aloisi F. Immune function of microglia. *Glia*. 2001;36(2):165-79. doi: 10.1002/glia.1106.  
701 PubMed PMID: 11596125.
- 702 87. Pang Y, Dai X, Roller A, Carter K, Paul I, Bhatt AJ, et al. Early Postnatal Lipopolysaccharide  
703 Exposure Leads to Enhanced Neurogenesis and Impaired Communicative Functions in Rats. *PLoS*  
704 *One*. 2016;11(10):e0164403. Epub 2016/10/11. doi: 10.1371/journal.pone.0164403. PubMed PMID:  
705 27723799; PubMed Central PMCID: PMC5056722.
- 706 88. Doenni VM, Gray JM, Song CM, Patel S, Hill MN, Pittman QJ. Deficient adolescent social  
707 behavior following early-life inflammation is ameliorated by augmentation of anandamide signaling.  
708 *Brain Behav Immun*. 2016;58:237-47. Epub 2016/07/28. doi: 10.1016/j.bbi.2016.07.152. PubMed  
709 PMID: 27453335; PubMed Central PMCID: PMC5461973.
- 710 89. Sciara AN, Beasley B, Crawford JD, Anderson EP, Carrasco T, Zheng S, et al.  
711 Neuroinflammatory Gene Expression Alterations in Anterior Cingulate Cortical White and Gray  
712 Matter of Males With Autism Spectrum Disorder. *Autism Res*. 2020;13(6):870-84. Epub 2020/03/05.  
713 doi: 10.1002/aur.2284. PubMed PMID: 32129578; PubMed Central PMCID: PMC540672.

- 714 90. Yenkovyan K, Grigoryan A, Fereshetyan K, Yepremyan D. Advances in understanding the  
715 pathophysiology of autism spectrum disorders. *Behav Brain Res.* 2017;331:92-101. doi:  
716 10.1016/j.bbr.2017.04.038. PubMed PMID: 28499914.
- 717 91. Nallathambi R, Mazuz M, Ion A, Selvaraj G, Weininger S, Fridlender M, et al. Anti-  
718 Inflammatory Activity in Colon Models Is Derived from  $\Delta^9$ -Tetrahydrocannabinolic Acid That  
719 Interacts with Additional Compounds in Cannabis Extracts. *Cannabis Cannabinoid Res.*  
720 2017;2(1):167-82. Epub 2017/10/31. doi: 10.1089/can.2017.0027. PubMed PMID: 29082314;  
721 PubMed Central PMCID: PMC5627671.
- 722 92. Takeda S, Misawa K, Yamamoto I, Watanabe K. Cannabidiolic acid as a selective  
723 cyclooxygenase-2 inhibitory component in cannabis. *Drug Metab Dispos.* 2008;36(9):1917-21. Epub  
724 2008/06/17. doi: 10.1124/dmd.108.020909. PubMed PMID: 18556441.
- 725 93. Henshaw FR, Dewsbury LS, Lim CK, Steiner GZ. The Effects of Cannabinoids on Pro- and  
726 Anti-Inflammatory Cytokines: A Systematic Review of In Vivo Studies. *Cannabis Cannabinoid Res.*  
727 2021;6(3):177-95. Epub 2021/05/18. doi: 10.1089/can.2020.0105. PubMed PMID: 33998900;  
728 PubMed Central PMCID: PMC8266561.
- 729 94. Lim SY, Sharan S, Woo S. Model-Based Analysis of Cannabidiol Dose-Exposure  
730 Relationship and Bioavailability. *Pharmacotherapy.* 2020;40(4):291-300. Epub 2020/02/15. doi:  
731 10.1002/phar.2377. PubMed PMID: 32058609.
- 732 95. dos-Santos-Pereira M, Guimarães FS, Del-Bel E, Raisman-Vozari R, Michel PP. Cannabidiol  
733 prevents LPS-induced microglial inflammation by inhibiting ROS/NF- $\kappa$ B-dependent signaling and  
734 glucose consumption. *Glia.* 2020;68(3):561-73. doi: <https://doi.org/10.1002/glia.23738>.
- 735 96. Hassan S, Eldeeb K, Millns PJ, Bennett AJ, Alexander SP, Kendall DA. Cannabidiol  
736 enhances microglial phagocytosis via transient receptor potential (TRP) channel activation. *Br J*  
737 *Pharmacol.* 2014;171(9):2426-39. Epub 2014/03/20. doi: 10.1111/bph.12615. PubMed PMID:  
738 24641282; PubMed Central PMCID: PMC3997281.

- 739 97. Esposito G, Scuderi C, Valenza M, Togna GI, Latina V, De Filippis D, et al. Cannabidiol  
740 reduces A $\beta$ -induced neuroinflammation and promotes hippocampal neurogenesis through PPAR $\gamma$   
741 involvement. PLoS One. 2011;6(12):e28668. Epub 2011/12/14. doi: 10.1371/journal.pone.0028668.  
742 PubMed PMID: 22163051; PubMed Central PMCID: PMCPMC3230631.
- 743 98. Wolf SA, Bick-Sander A, Fabel K, Leal-Galicia P, Tauber S, Ramirez-Rodriguez G, et al.  
744 Cannabinoid receptor CB1 mediates baseline and activity-induced survival of new neurons in adult  
745 hippocampal neurogenesis. Cell Commun Signal. 2010;8:12. Epub 2010/06/23. doi: 10.1186/1478-  
746 811x-8-12. PubMed PMID: 20565726; PubMed Central PMCID: PMCPMC2898685.
- 747 99. Luján M, Valverde O. The Pro-neurogenic Effects of Cannabidiol and Its Potential  
748 Therapeutic Implications in Psychiatric Disorders. Front Behav Neurosci. 2020;14:109. Epub  
749 2020/07/18. doi: 10.3389/fnbeh.2020.00109. PubMed PMID: 32676014; PubMed Central PMCID:  
750 PMCPMC7333542.
- 751 100. Campos AC, Fogaça MV, Scarante FF, Joca SRL, Sales AJ, Gomes FV, et al. Plastic and  
752 Neuroprotective Mechanisms Involved in the Therapeutic Effects of Cannabidiol in Psychiatric  
753 Disorders. Front Pharmacol. 2017;8:269. Epub 2017/06/08. doi: 10.3389/fphar.2017.00269. PubMed  
754 PMID: 28588483; PubMed Central PMCID: PMCPMC5441138.
- 755 101. Luján M, Castro-Zavala A, Alegre-Zurano L, Valverde O. Repeated Cannabidiol treatment  
756 reduces cocaine intake and modulates neural proliferation and CB1R expression in the mouse  
757 hippocampus. Neuropharmacology. 2018;143:163-75. Epub 2018/10/03. doi:  
758 10.1016/j.neuropharm.2018.09.043. PubMed PMID: 30273593.
- 759 102. Fogaça MV, Campos AC, Coelho LD, Duman RS, Guimarães FS. The anxiolytic effects of  
760 cannabidiol in chronically stressed mice are mediated by the endocannabinoid system: Role of  
761 neurogenesis and dendritic remodeling. Neuropharmacology. 2018;135:22-33. Epub 2018/03/07. doi:  
762 10.1016/j.neuropharm.2018.03.001. PubMed PMID: 29510186.



763 103. Campos AC, Ortega Z, Palazuelos J, Fogaça MV, Aguiar DC, Díaz-Alonso J, et al. The  
764 anxiolytic effect of cannabidiol on chronically stressed mice depends on hippocampal neurogenesis:  
765 involvement of the endocannabinoid system. *Int J Neuropsychopharmacol.* 2013;16(6):1407-19. Epub  
766 2013/01/10. doi: 10.1017/s1461145712001502. PubMed PMID: 23298518.

767 104. Giacoppo S, Pollastro F, Grassi G, Bramanti P, Mazzon E. Target regulation of  
768 PI3K/Akt/mTOR pathway by cannabidiol in treatment of experimental multiple sclerosis. *Fitoterapia.*  
769 2017;116:77-84. Epub 2016/11/29. doi: 10.1016/j.fitote.2016.11.010. PubMed PMID: 27890794.

770

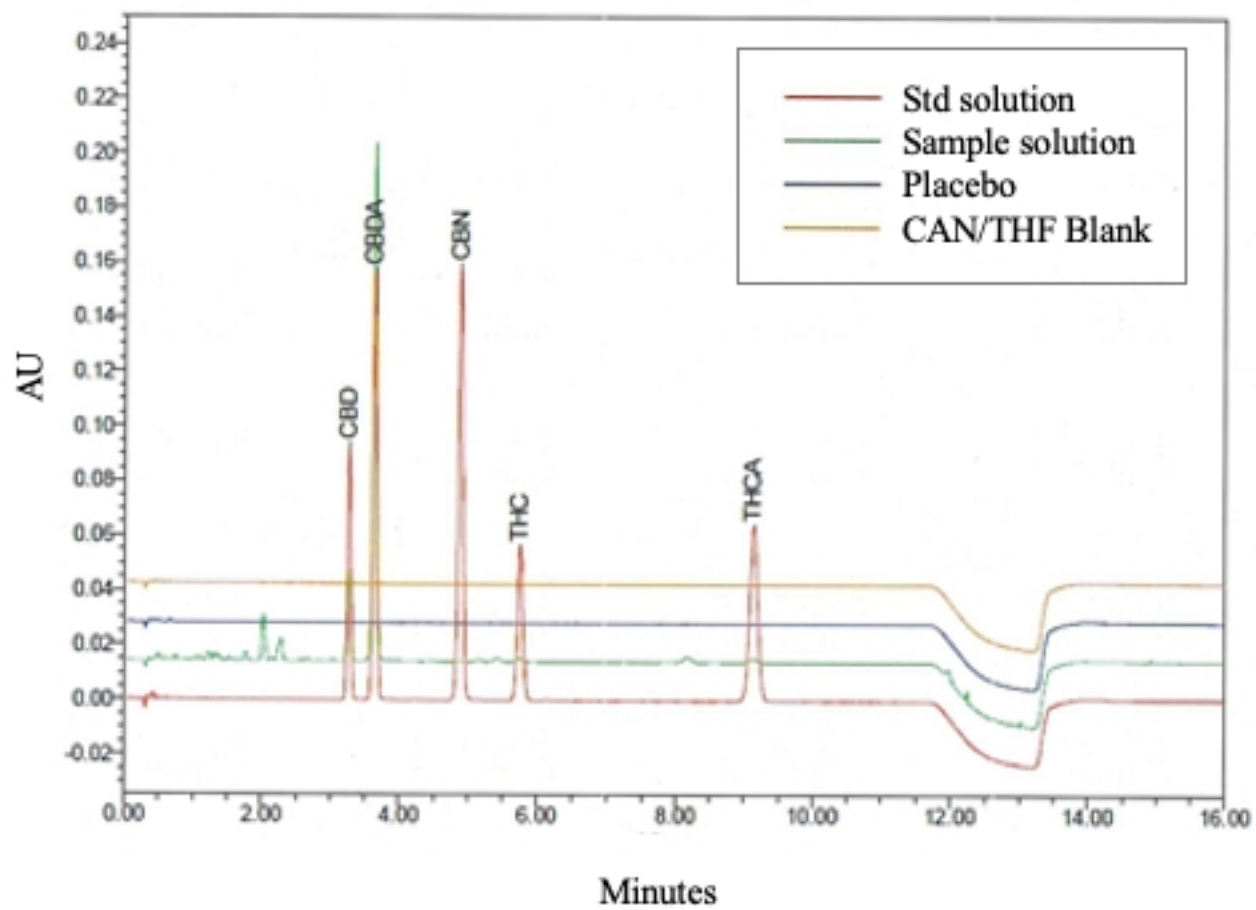

Figure 1

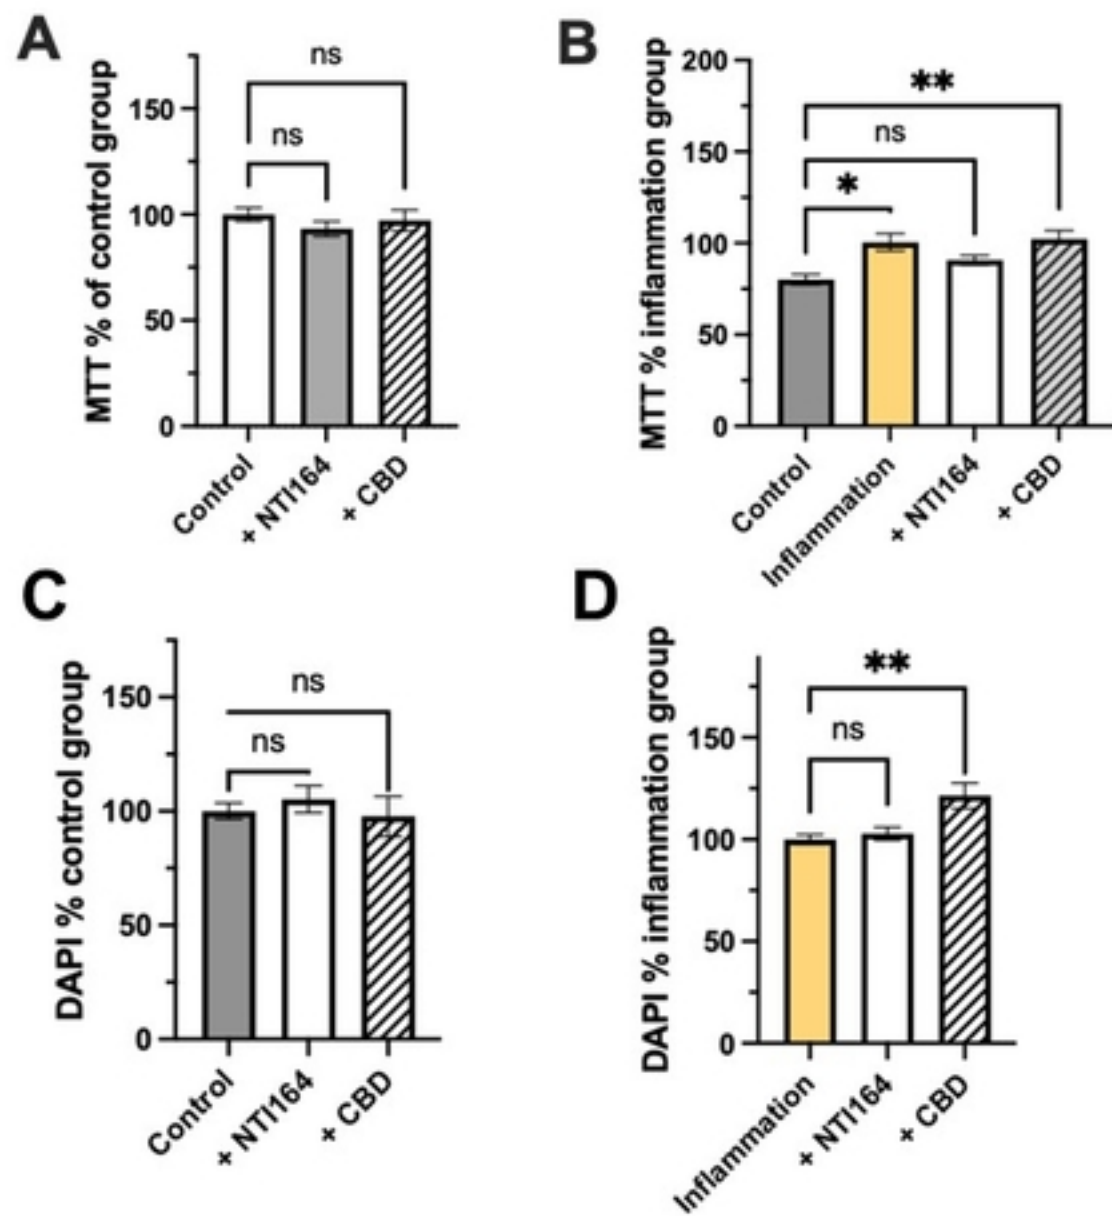

Figure 2

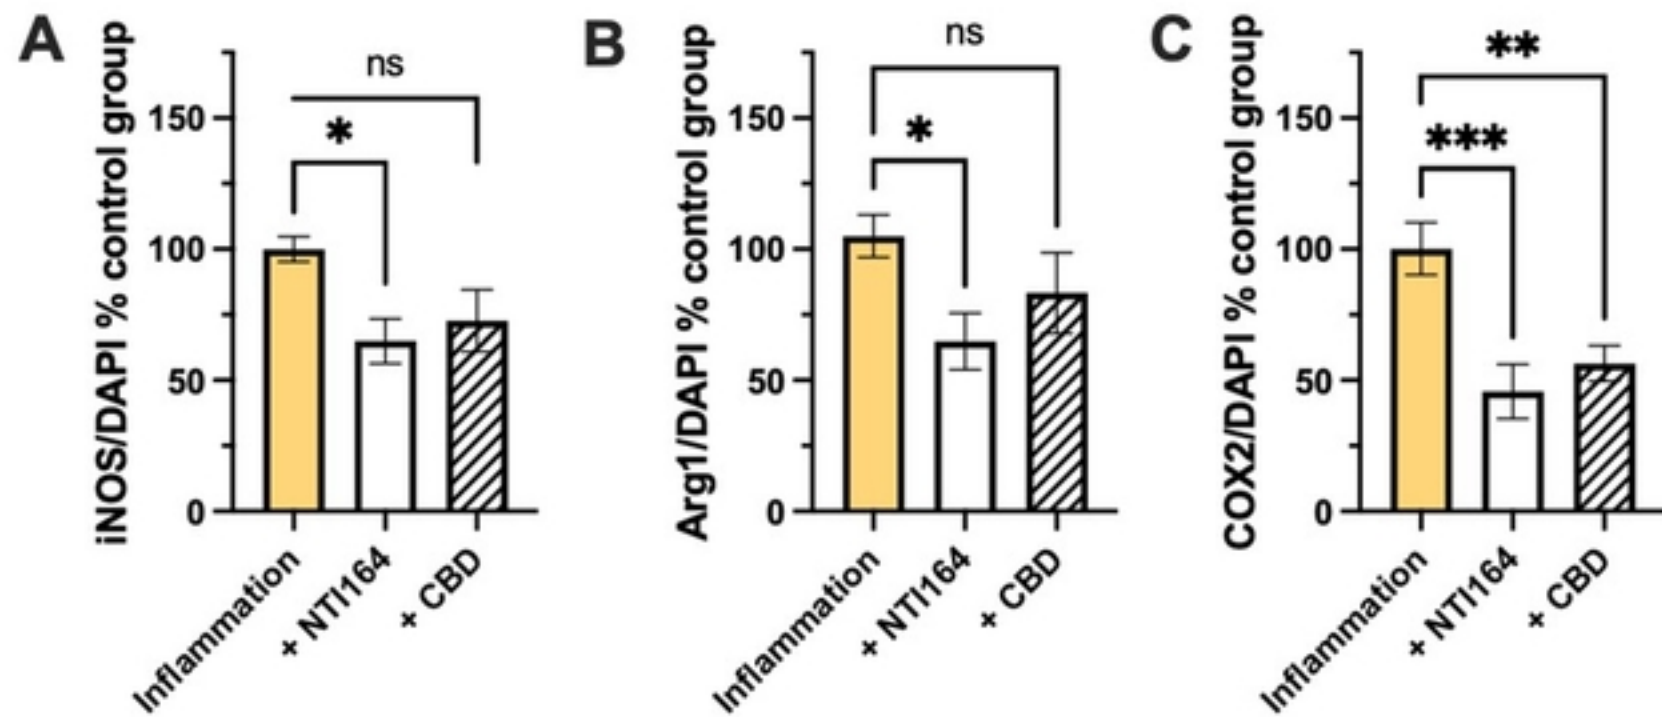

Figure 3

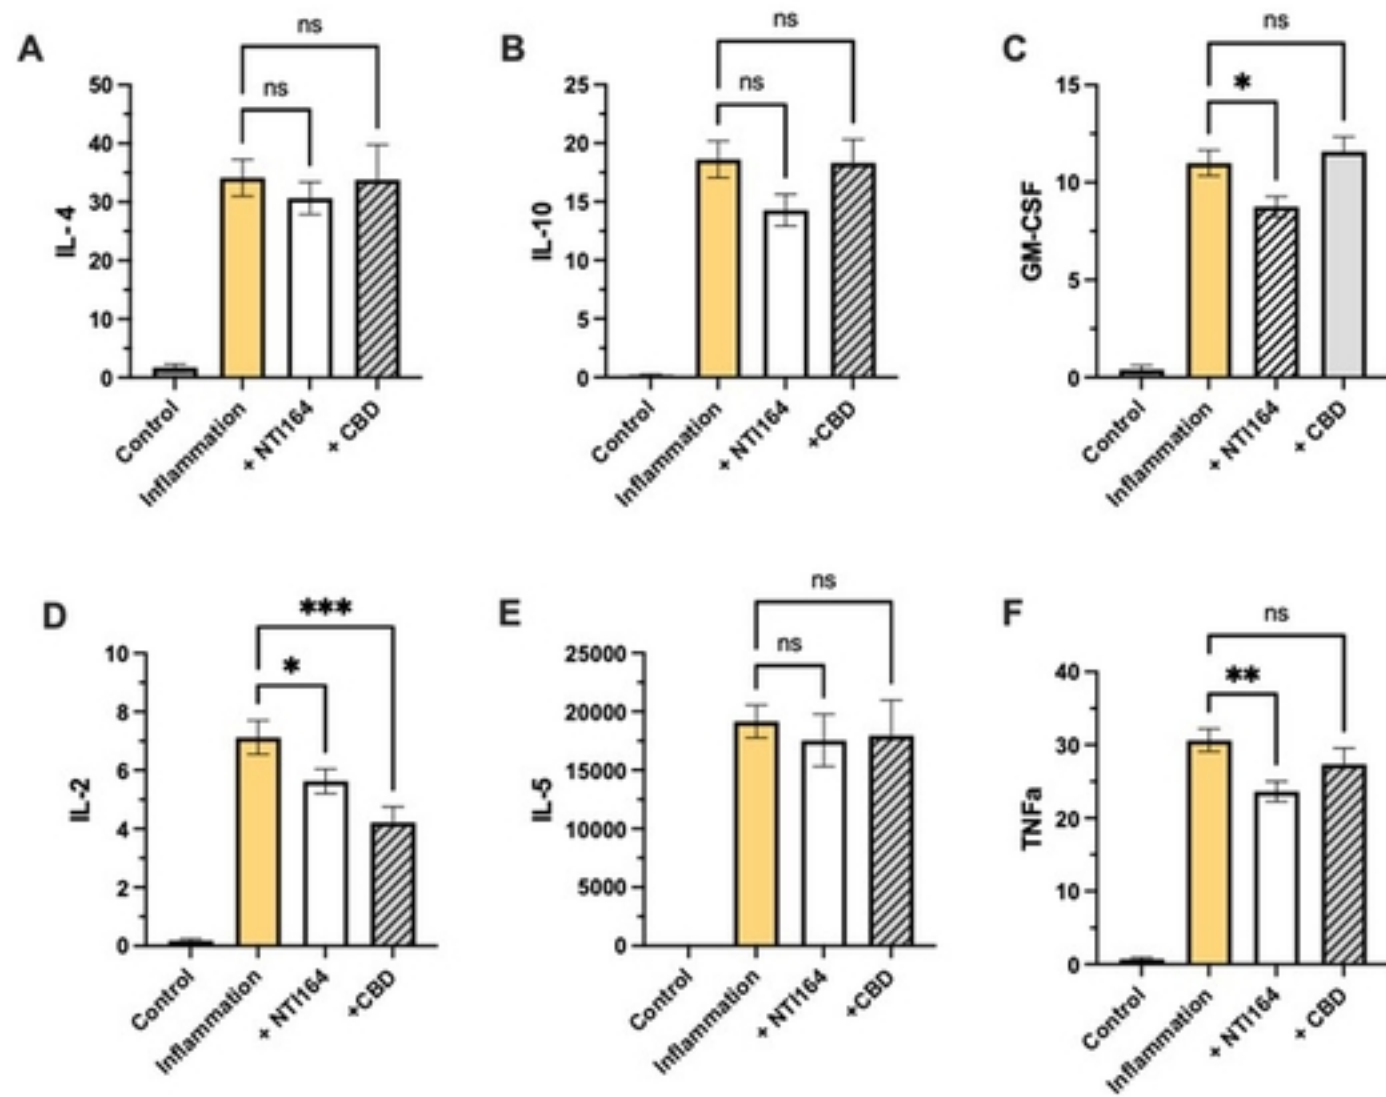

Figure 4

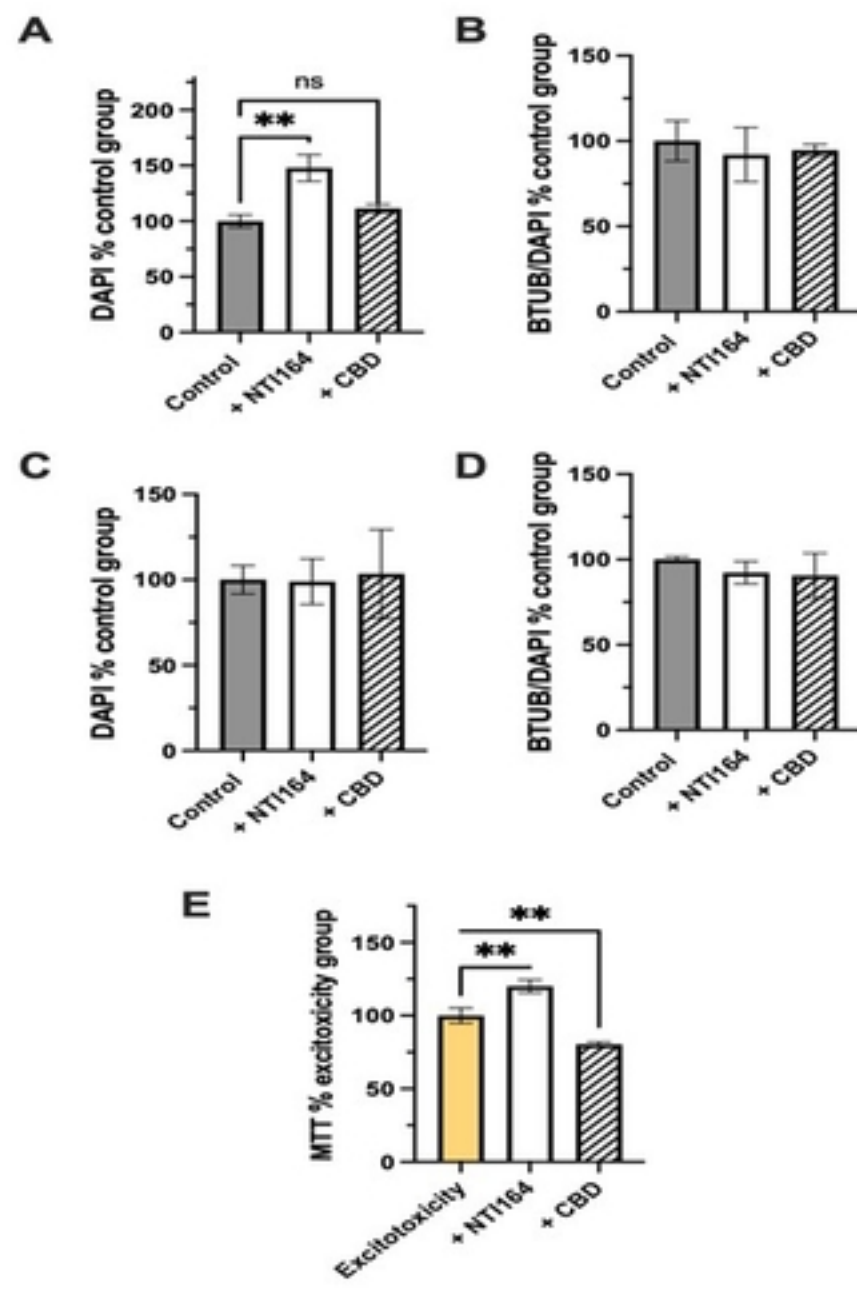

Figure 5
